# Supplementary material
Source: MDPI journal article supplement (https://www.mdpi.com/2673-7523/4/2/5)
Supplement: s1 [file s1]

Archive with 1 entries (1 files):
- onco-2874004-supplementary.pdf
